# Supplementary material for: Systematic Analysis of Metabolic Bottlenecks in the Methylerythritol 4-Phosphate (MEP) Pathway of Zymomonas mobilis
Source: PubMed Central journal article supplement (PMC10134818; doi:10.1128/msystems.00092-23), 2023-03-30

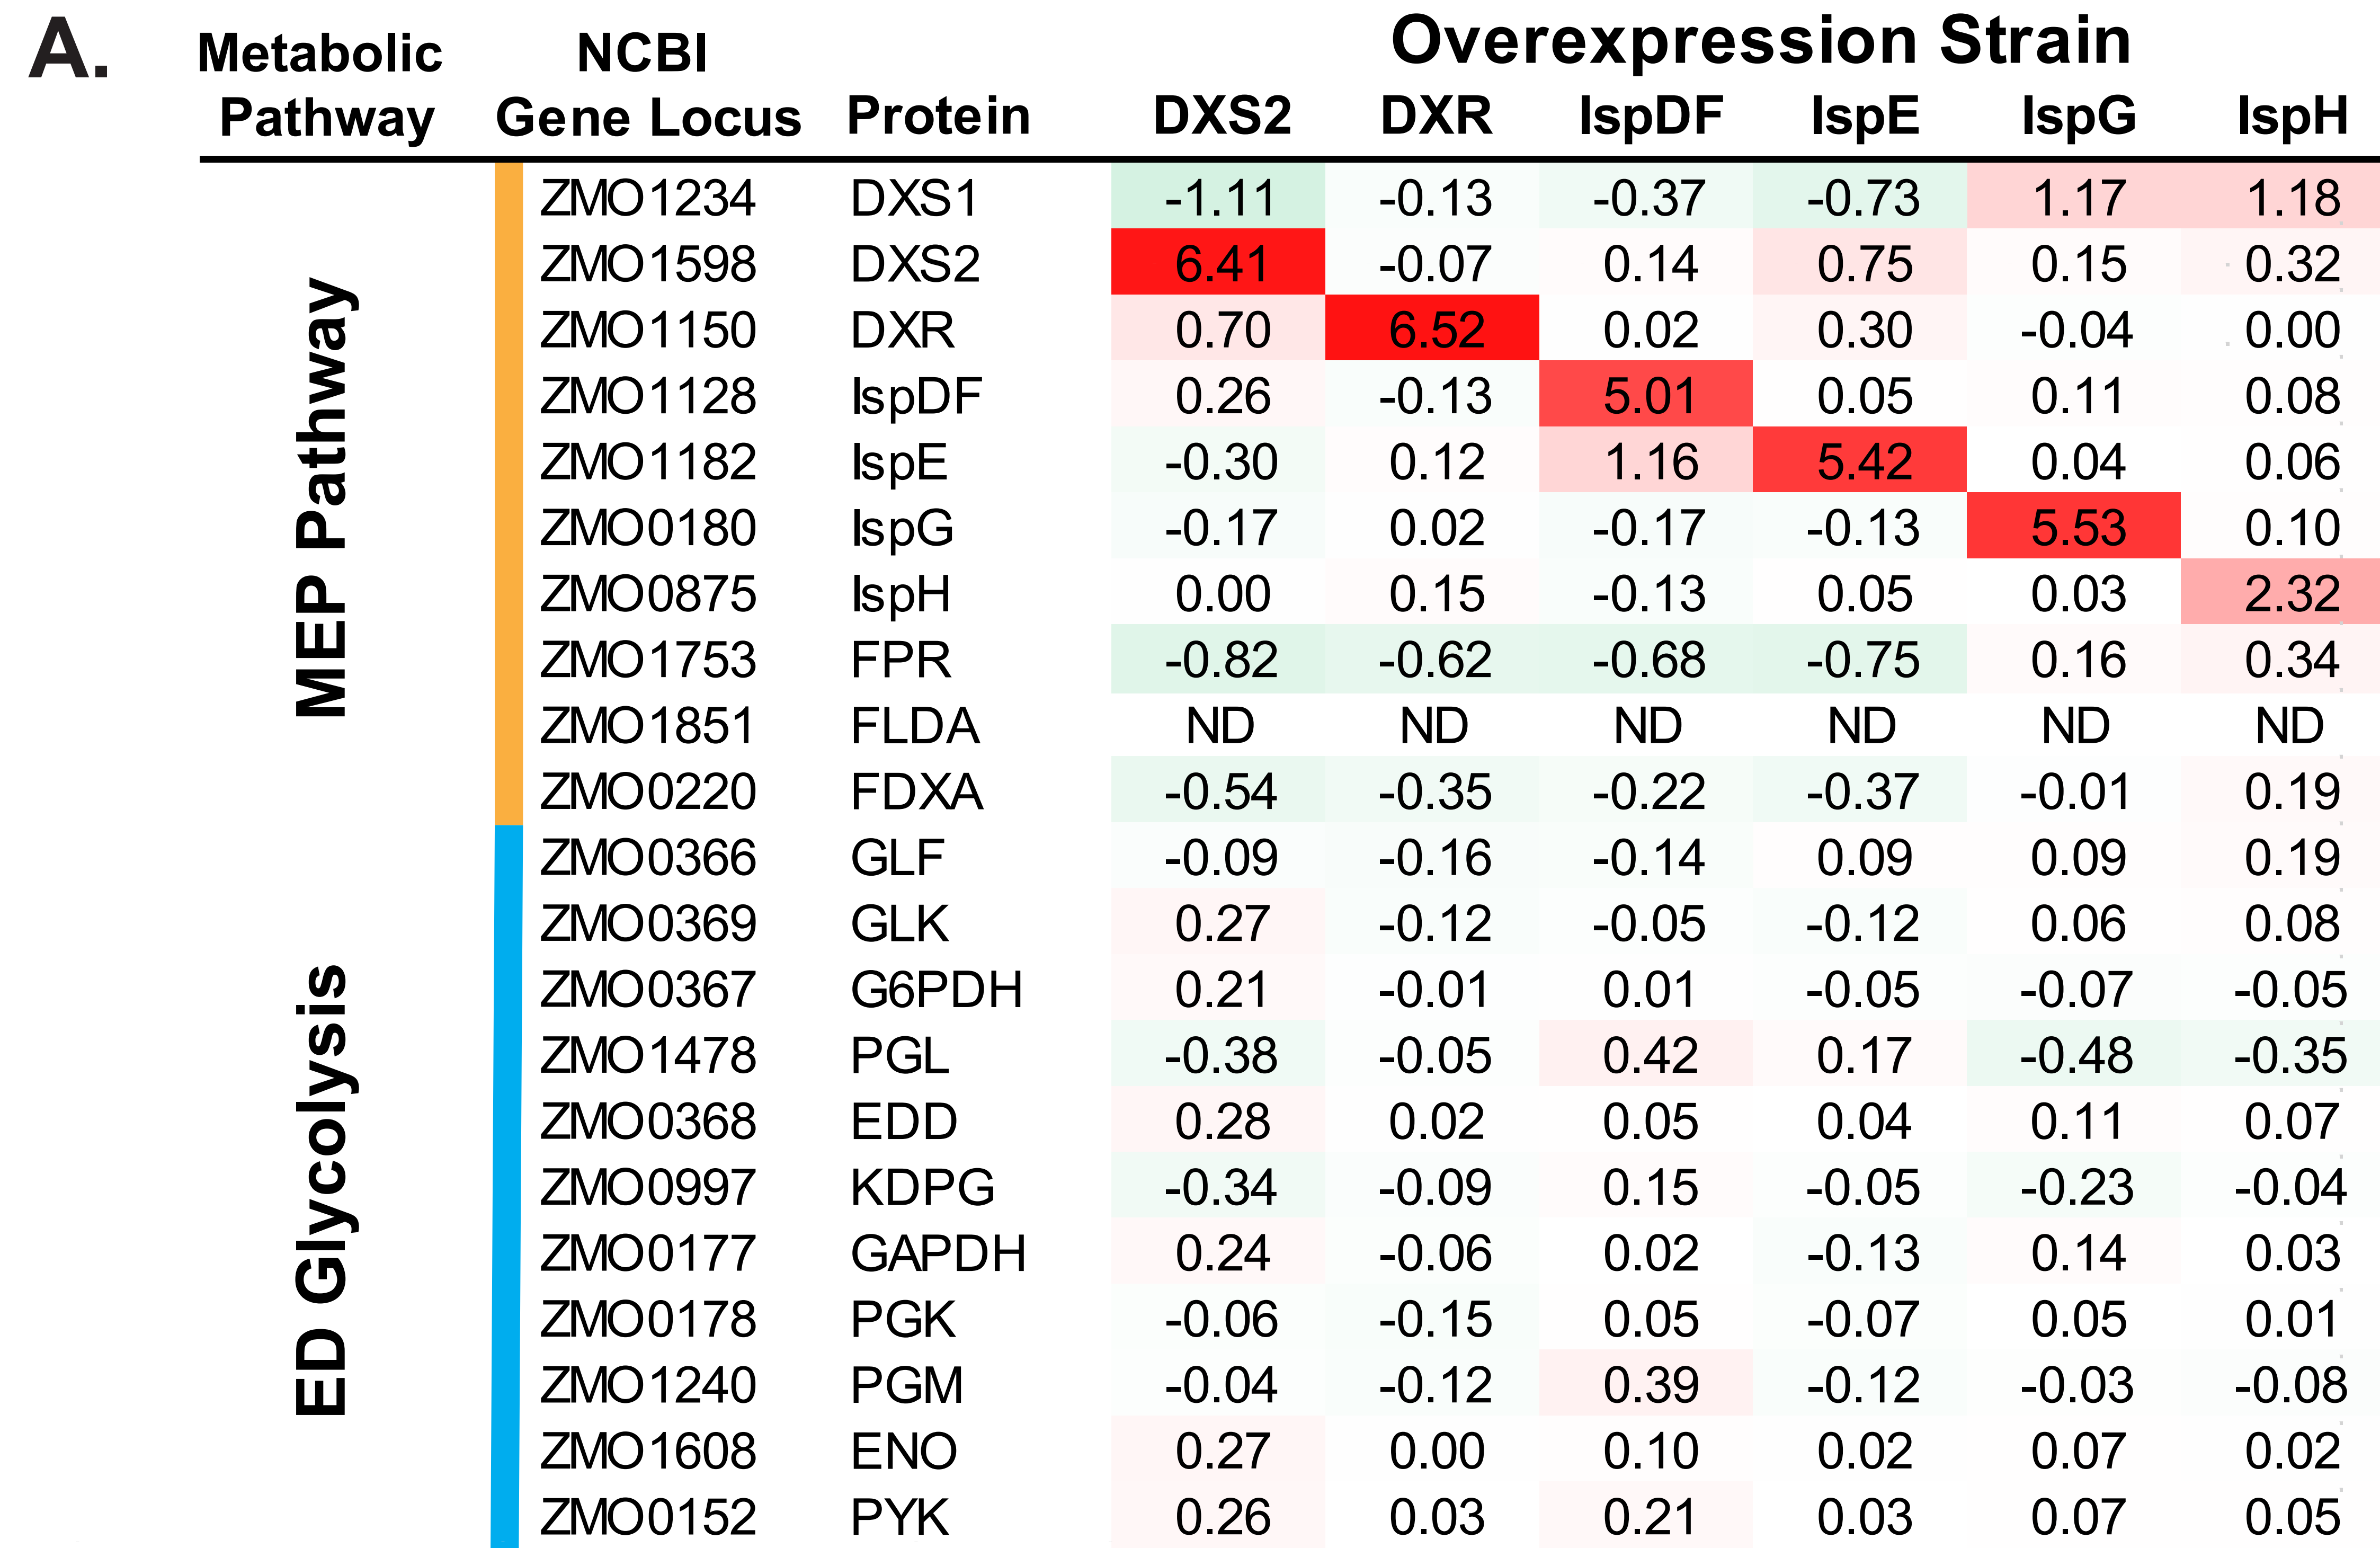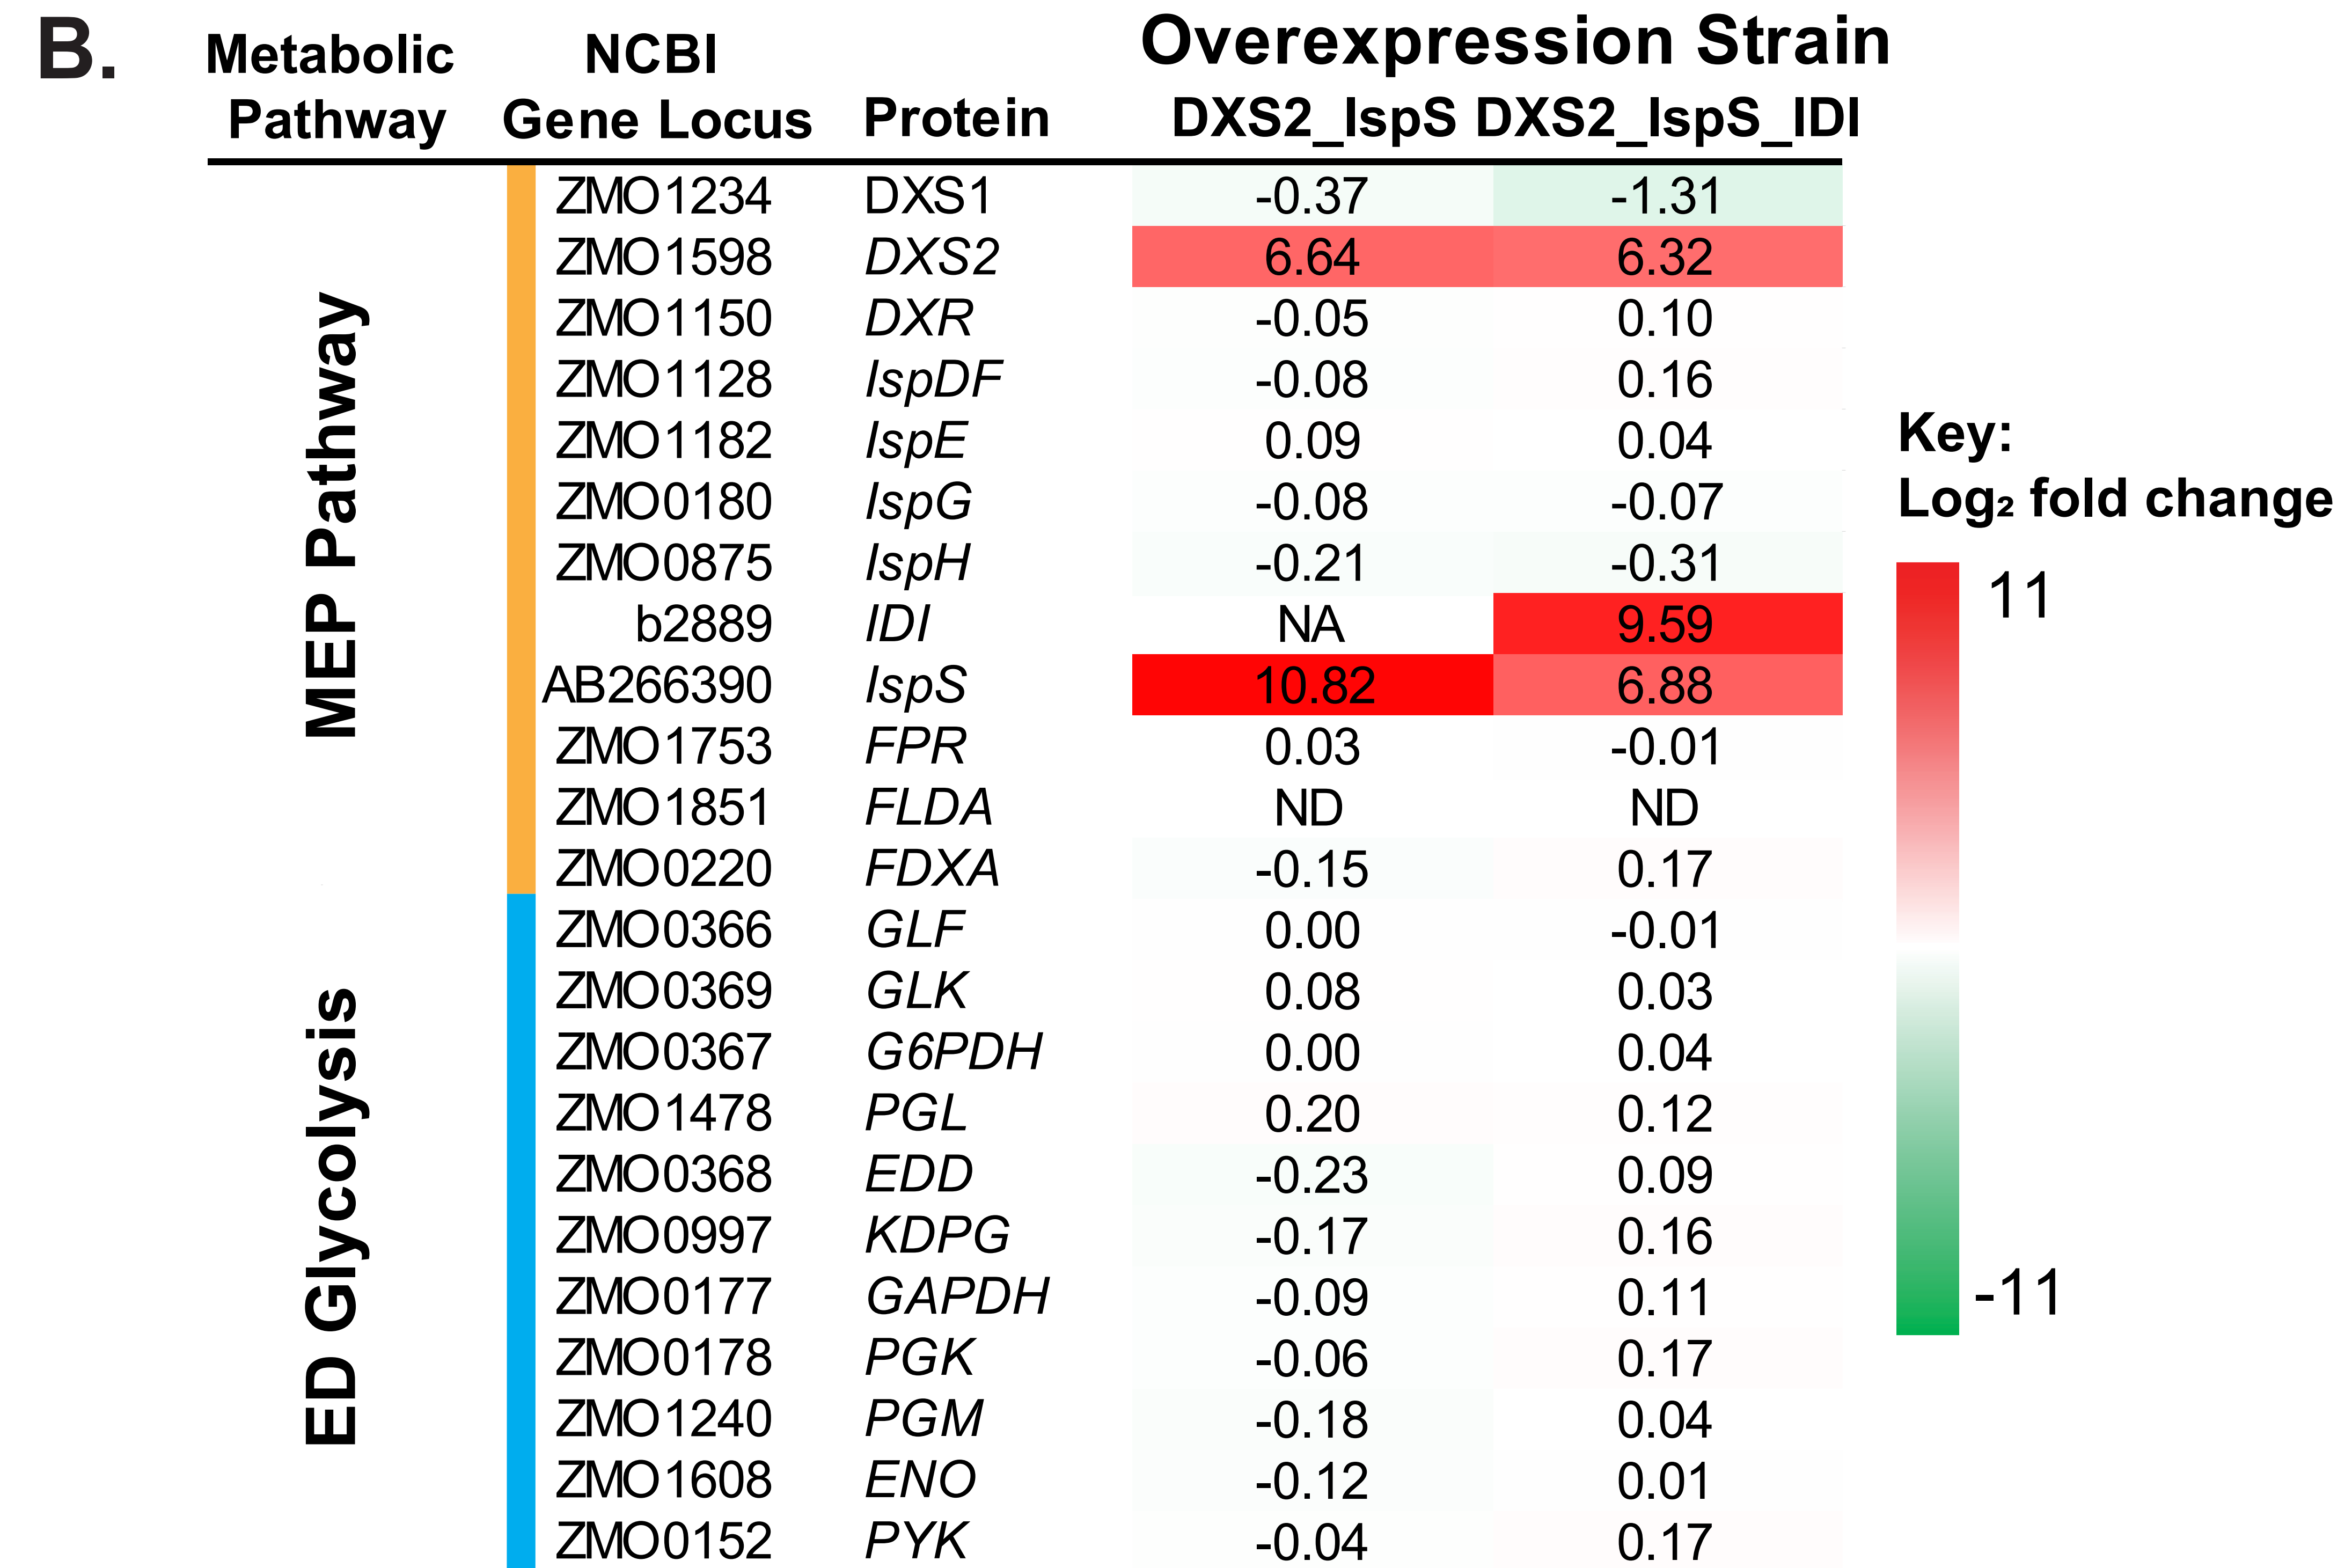

Supplement: msystems.00092-23-s0001.pdf [file msystems.00092-23-s0001.pdf]
