# Supplementary material for: Systematic Analysis of Metabolic Bottlenecks in the Methylerythritol 4-Phosphate (MEP) Pathway of Zymomonas mobilis
Source: PubMed Central journal article supplement (PMC10134818; doi:10.1128/msystems.00092-23), 2023-03-30
Supplement: msystems.00092-23-s0005.pdf [file msystems.00092-23-s0005.pdf]

**Fold change**

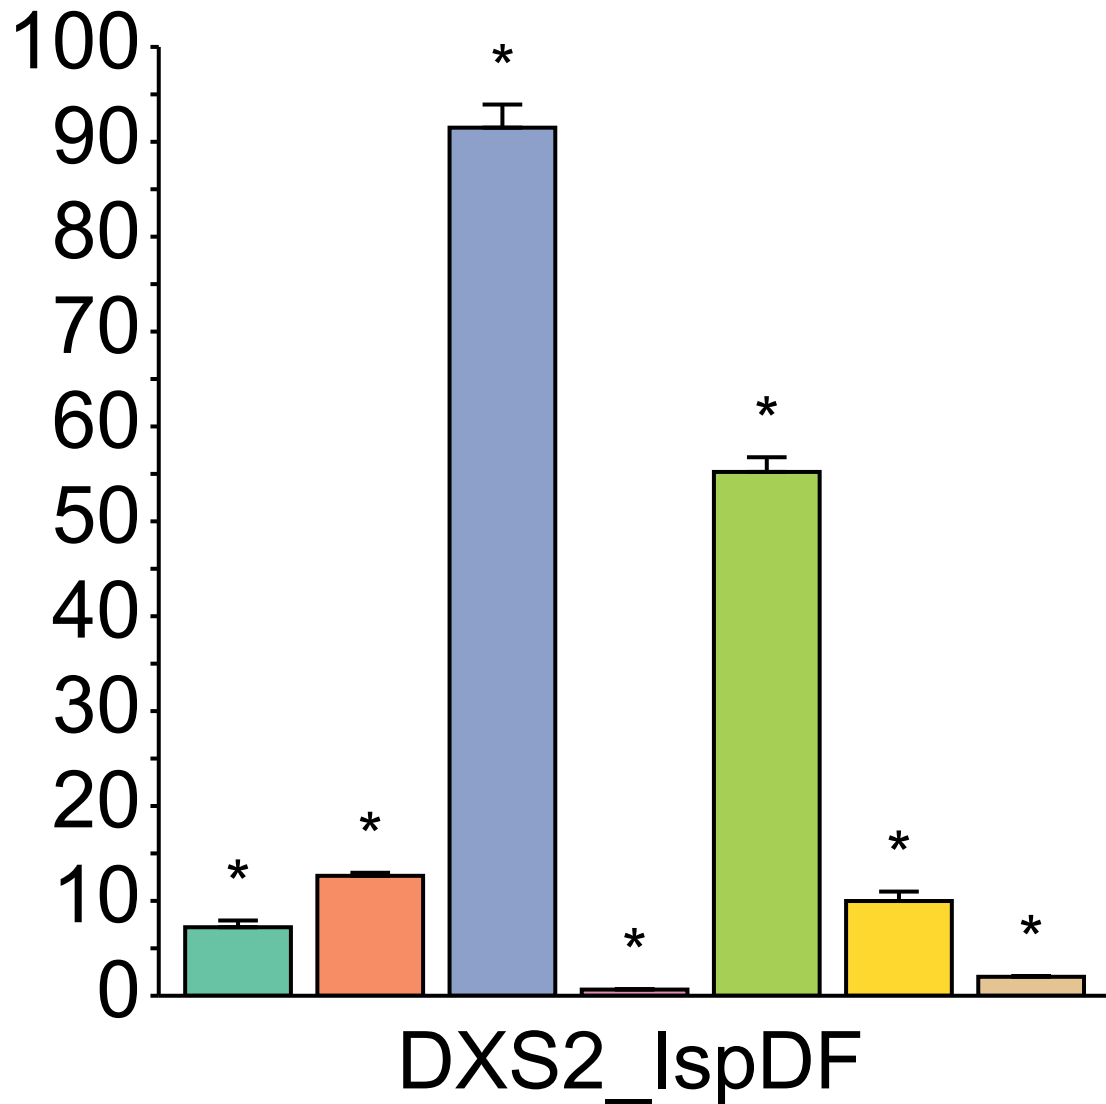

**MEP Metabolite**

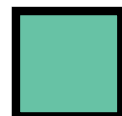

DXP

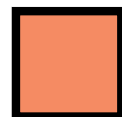

MEP

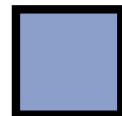

CDP-ME

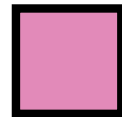

CDP-MEP

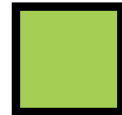

MEcDP

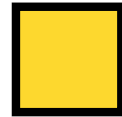

HMBDP

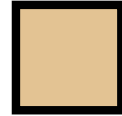

IDP/DMADP
